# Supplementary material
Source: Elsevier journal article supplement (https://rcastoragev2.blob.core.windows.net/a82c18601d8384742bf8cc661568313a/mmc1.pdf)
Supplement: mmc1 [file mmc1.pdf]

## Supplemental Data

### Interleukin-23 Restrains Regulatory T Cell Activity

#### to Drive T Cell-Dependent Colitis

Ana Izcue, Sophie Hue, Sofia Buonocore, Carolina V. Arancibia-Cárcamo, Philip P. Ahern, Yoichiro Iwakura, Kevin J. Maloy, and Fiona Powrie

Supplemental Experimental Procedures:

Primers and Probe Sequences for Taqman qPCR

|                | Primers                                                               | Probe                                 |
|----------------|-----------------------------------------------------------------------|---------------------------------------|
| HPRT           | 5'-GACCGGTCCCGTCATGC-3'<br>and 5'-TCATAACCTGGTTCATCATCGC-3'           | 5'-ACCCGCAGTCCCAGCGTCGTC-3'           |
| CD3 $\gamma$   | 5'-TTACAGAATGTGTGAAAAGTGCATTG-3'<br>and 5'-CACCAAGAGCAAGGAAGAAGATG-3' | 5'-ACATAGGCACCATATCCGGCTTTATCTTCG-3'  |
| ROR $\gamma$ t | 5'-CCGCTGAGAGGGGCTTCAC-3'<br>and 5'-TGCAGGAGTAGGCCACATTACA-3'         | 5'-AAGGGCTTCTTCCGCCGCAGCCAGCAG-3'     |
| IL-6           | 5'-GAGGATACCACTCCCAACAGACC-3'<br>and 5'-AAGTGCATCATCGTTGTTTCATACA-3'  | 5'-CAGAATTGCCATTGCACAACCTCTTTTCTCA-3' |
| IL-21          | 5'-ATCCTGAACTTCTATCAGCTCCAC-3'<br>and 5'-GCATTTAGCTATGTGCTTCTGTTTC-3' | 5'-AAGCCATCAAACCCTGGAAACAATAAGACA-3'  |
| IL-27p28       | 5'-ATCTCGATTGCCAGGAGTGA-3'<br>and 5'-GTGGTAGCGAGGAAGCAGAGT-3'         | 5'-TTCCCAATGTTTCCCTGACTTTCCA-3'       |
| IL-27EBI3      | 5'-GCCATGCTTCTCGGTATCC-3'<br>and 5'-GAGCCTGTAAGTGGCAATGA-3'           | 5'-TCCAGGCTCCCAACTCCACCA-3'           |

All probes were labeled FAM/TAMRA.

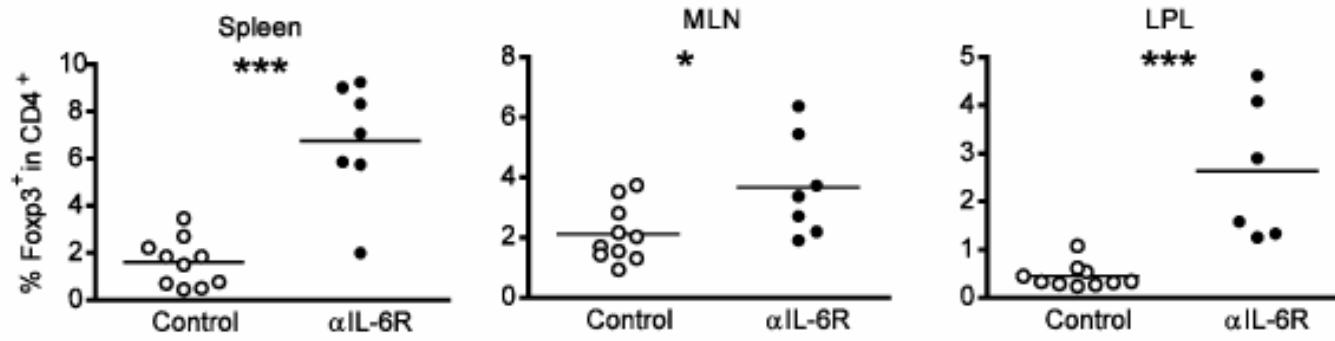

**Figure S1. Frequency of Foxp3<sup>+</sup> Cells among CD4<sup>+</sup> Cells after anti-IL-6R Treatment**

Frequency of Foxp3<sup>+</sup> among CD4<sup>+</sup> cells from spleen, MLN and colonic LPL from *Rag*<sup>-/-</sup> mice transferred with CD4<sup>+</sup> CD25<sup>-</sup> CD45RB<sup>hi</sup> naive T cells. Controls were left untreated, and the anti-IL-6R group received 2 mg of 15A7 purified antibody i.p. on the day of T cell transfer and then once a week until the end of the experiment. This treatment abrogated colitis as described (Yamamoto et al., 2000). Each point represents an individual mouse; data are pooled from two independent experiments, one on BALB/c *Rag*<sup>2-/-</sup> and another one on C57BL/6 *Rag*<sup>1-/-</sup> background which yielded similar results.
